# Supplementary material for: Alteration of Gut Microbiome and Correlated Lipid Metabolism in Post-Stroke Depression
Source: PubMed Central journal article supplement (PMC8100602; doi:10.3389/fcimb.2021.663967), 2021-04-22
Supplement: DataSheet_1.pdf [file DataSheet_1.pdf]

## *Supplementary Material*

### Supplementary Tables

**Table S1.** Stressors used in the CUMS procedure

| Week          | Monday                                                | Tuesday               | Wednesday                                               | Thursday                                              | Friday                                        | Saturday                               | Sunday                        |
|---------------|-------------------------------------------------------|-----------------------|---------------------------------------------------------|-------------------------------------------------------|-----------------------------------------------|----------------------------------------|-------------------------------|
| <b>Week 1</b> | Water and food deprivation (24hrs)                    | 45° cage tilt (24hrs) | Tail pinch (1min);<br>Overnight lighting (36hrs)        | Swimming in 4 °C water (5min);<br>Soiled cage (24hrs) | Restrain (4hrs);<br>Water deprivation (24hrs) | SPT (1hr);<br>Food deprivation (24hrs) | Collect fecal samples;<br>BW  |
| <b>Week 2</b> | Tail pinch (1min)                                     | 45° cage tilt (24hrs) | Restrain (4hrs);<br>Overnight lighting (36hrs)          | Swimming in 4 °C water (5min);<br>Soiled cage (24hrs) | Water deprivation (24hrs)                     | SPT (1hr);<br>Food deprivation (24hrs) | Collect fecal samples;<br>BW  |
| <b>Week 3</b> | Swimming in 4 °C water (5min);<br>Soiled cage (24hrs) | Tail pinch (1min)     | Restrain (4hrs);<br>Overnight lighting (36hrs)          | 45° cage tilt (24hrs)                                 | Water deprivation (24hrs)                     | SPT (1hr);<br>Food deprivation (24hrs) | Collect fecal samples;<br>BW  |
| <b>Week 4</b> | Tail pinch (1min)                                     | Soiled cage (24hrs)   | Swimming in 4 °C water (5min);<br>45° cage tilt (24hrs) | Restrain (4hrs);<br>Overnight lighting (36hrs)        | Water deprivation (24hrs)                     | SPT (1hr);<br>Food deprivation (24hrs) | Collect fecal samples;<br>BW; |

SPT, sucrose preference test; BW, body weight

**Table S2.** Differential operational taxonomic units (OTUs) of PSD

| OTU ID  | Taxonomic Assignment |                            |                                 | Relative Abundance |         |          |         |          |         | LDA value | LDA p-value |
|---------|----------------------|----------------------------|---------------------------------|--------------------|---------|----------|---------|----------|---------|-----------|-------------|
|         | Phylum               | Family                     | Genus                           | C (Mean)           | C (Sd)  | S (Mean) | S (Sd)  | P (Mean) | P (Sd)  |           |             |
| OTU258  | Firmicutes           | Lachnospiraceae            | Blautia                         | 1.4E-03            | 1.5E-03 | 5.1E-03  | 1.2E-02 | 4.8E-02  | 6.0E-02 | 2.40      | 0.040       |
| OTU383  | Firmicutes           | Lachnospiraceae            | Blautia                         | 5.6E-03            | 9.8E-03 | 4.3E-02  | 6.3E-02 | 1.1E-01  | 1.3E-01 | 2.75      | 0.044       |
| OTU476  | Firmicutes           | Lachnospiraceae            | Bacteroides                     | 3.3E-02            | 2.8E-02 | 0.0E+00  | 0.0E+00 | 8.0E-02  | 1.0E-01 | 2.63      | 0.026       |
| OTU487  | Firmicutes           | Lachnospiraceae            | Lachnospiraceae_UCG-001         | 1.9E-03            | 3.4E-03 | 0.0E+00  | 0.0E+00 | 2.5E-02  | 2.3E-02 | 2.39      | 0.006       |
| OTU698  | Firmicutes           | Lachnospiraceae            | unclassified_f__Lachnospiraceae | 9.3E-04            | 1.4E-03 | 0.0E+00  | 0.0E+00 | 1.3E-02  | 1.5E-02 | 2.30      | 0.006       |
| OTU1371 | Firmicutes           | Lachnospiraceae            | Marvinbryantia                  | 4.6E-03            | 3.4E-03 | 3.6E-02  | 6.0E-02 | 6.8E-02  | 1.0E-01 | 2.64      | 0.036       |
| OTU521  | Firmicutes           | Lactobacillaceae           | Lactobacillus                   | 8.8E-03            | 1.1E-02 | 0.0E+00  | 0.0E+00 | 9.7E-03  | 1.2E-02 | 2.16      | 0.025       |
| OTU594  | Firmicutes           | Streptococcaceae           | Streptococcus                   | 2.5E-02            | 2.5E-02 | 1.8E-02  | 1.4E-02 | 9.5E-02  | 6.4E-02 | 2.66      | 0.023       |
| OTU1145 | Firmicutes           | Streptococcaceae           | Streptococcus                   | 9.3E-03            | 1.0E-02 | 8.8E-03  | 1.2E-02 | 3.8E-02  | 3.9E-02 | 2.34      | 0.050       |
| OTU552  | Firmicutes           | Erysipelotrichaceae        | norank_f__Erysipelotrichaceae   | 0.0E+00            | 0.0E+00 | 4.2E-03  | 5.8E-03 | 1.4E-02  | 9.8E-03 | 2.36      | 0.013       |
| OTU123  | Firmicutes           | Ruminococcaceae            | Ruminococcaceae_UCG-014         | 2.8E-03            | 3.0E-03 | 1.4E-03  | 2.3E-03 | 1.1E-02  | 8.4E-03 | 2.52      | 0.034       |
| OTU189  | Firmicutes           | Ruminococcaceae            | Ruminococcaceae_UCG-014         | 2.3E-03            | 2.1E-03 | 9.3E-04  | 1.4E-03 | 6.0E-03  | 5.4E-03 | 2.78      | 0.046       |
| OTU1298 | Firmicutes           | Veillonellaceae            | Veillonella                     | 9.3E-04            | 2.3E-03 | 4.6E-04  | 1.1E-03 | 2.0E-02  | 2.5E-02 | 2.59      | 0.003       |
| OTU558  | Firmicutes           | Enterococcaceae            | Enterococcus                    | 2.9E-02            | 3.0E-02 | 1.4E-03  | 1.5E-03 | 5.5E-02  | 7.8E-02 | 2.38      | 0.021       |
| OTU1393 | Bacteroidetes        | Muribaculaceae             | norank_f__Muribaculaceae        | 4.6E-04            | 1.1E-03 | 1.2E-02  | 2.2E-02 | 1.0E-01  | 1.5E-01 | 2.83      | 0.029       |
| OTU1286 | Bacteroidetes        | Muribaculaceae             | norank_f__Muribaculaceae        | 4.6E-04            | 1.1E-03 | 3.7E-03  | 9.1E-03 | 3.9E-02  | 5.6E-02 | 2.46      | 0.021       |
| OTU1181 | Proteobacteria       | Burkholderiaceae           | Ralstonia                       | 9.3E-04            | 2.3E-03 | 4.2E-03  | 3.8E-03 | 1.1E-02  | 8.9E-03 | 2.32      | 0.021       |
| OTU569  | Proteobacteria       | Enterobacteriaceae         | Klebsiella                      | 0.0E+00            | 0.0E+00 | 9.3E-04  | 1.4E-03 | 2.3E-02  | 2.1E-02 | 2.50      | 0.006       |
| OTU1194 | Proteobacteria       | norank_o__Rhodospirillales | norank_o__Rhodospirillales      | 0.0E+00            | 0.0E+00 | 9.3E-04  | 1.4E-03 | 1.3E-02  | 2.0E-02 | 2.34      | 0.040       |
| OTU1346 | Tenericutes          | norank_o__Mollicutes_RF39  | norank_o__Mollicutes_RF39       | 1.7E-02            | 2.2E-02 | 7.4E-03  | 1.8E-02 | 4.5E-02  | 3.8E-02 | 2.37      | 0.027       |
| OTU1389 | Tenericutes          | Mycoplasmataceae           | Mycoplasma                      | 4.6E-04            | 1.1E-03 | 4.6E-04  | 1.1E-03 | 5.6E-03  | 8.2E-03 | 2.42      | 0.008       |
| OTU1310 | Actinobacteria       | Eggerthellaceae            | unclassified_f__Eggerthellaceae | 1.2E-02            | 8.3E-03 | 1.9E-02  | 1.4E-02 | 3.5E-02  | 1.7E-02 | 2.25      | 0.046       |

C, Control; S, Stroke; P, post-stroke depression; Sd, standard deviation

**Table S3.** Discriminative fecal metabolites of PSD

| Metabolite name        | Relative Abundance |          |          |          |            |          |           |           | up/down regulation |
|------------------------|--------------------|----------|----------|----------|------------|----------|-----------|-----------|--------------------|
|                        | C (mean)           | C (SD)   | S (mean) | S (SD)   | PSD (mean) | PSD (SD) | FC(PSD/C) | FC(PSD/S) |                    |
| Arbutin                | 1.74E-05           | 8.30E-06 | 1.56E-05 | 6.40E-06 | 6.39E-04   | 4.64E-04 | 36.67     | 40.91     | ↑                  |
| Lactobionic Acid       | 3.02E-05           | 1.45E-05 | 1.01E-04 | 1.93E-04 | 9.68E-04   | 1.05E-03 | 32.02     | 9.59      | ↑                  |
| Gallocatechin          | 4.94E-05           | 3.59E-05 | 5.86E-05 | 2.97E-05 | 1.43E-03   | 1.36E-03 | 28.99     | 24.45     | ↑                  |
| N-Acetyl-D-Mannosamine | 2.89E-05           | 1.36E-05 | 2.52E-05 | 8.49E-06 | 7.17E-04   | 6.25E-04 | 24.79     | 28.45     | ↑                  |
| 5-Methyluridine        | 4.62E-05           | 4.11E-05 | 2.65E-05 | 1.19E-05 | 1.03E-03   | 1.01E-03 | 22.19     | 38.69     | ↑                  |
| 1,5-Anhydroglucitol    | 2.75E-05           | 1.31E-05 | 2.34E-05 | 6.55E-06 | 6.02E-04   | 5.30E-04 | 21.91     | 25.76     | ↑                  |
| Lanosterol             | 4.88E-05           | 1.85E-05 | 2.05E-04 | 4.44E-04 | 1.02E-03   | 8.98E-04 | 20.86     | 4.98      | ↑                  |
| Sucrose-6-Phosphate    | 4.95E-05           | 3.92E-05 | 5.72E-05 | 3.57E-05 | 6.84E-04   | 8.79E-04 | 13.81     | 11.97     | ↑                  |
| Maleic acid            | 5.68E-05           | 3.06E-05 | 3.76E-05 | 1.62E-05 | 7.53E-04   | 8.02E-04 | 13.27     | 20.00     | ↑                  |
| Tyramine               | 1.13E-04           | 4.16E-05 | 1.01E-04 | 7.37E-05 | 9.29E-04   | 7.58E-04 | 8.22      | 9.19      | ↑                  |
| Cyanoalanine           | 2.28E-04           | 3.84E-04 | 6.89E-04 | 6.54E-04 | 1.59E-03   | 7.48E-04 | 6.97      | 2.31      | ↑                  |
| Ferulic Acid           | 1.37E-04           | 1.10E-04 | 1.85E-04 | 2.58E-04 | 8.98E-04   | 8.73E-04 | 6.57      | 4.86      | ↑                  |
| L-Kynurenine           | 1.52E-04           | 3.67E-04 | 1.53E-04 | 3.76E-04 | 9.52E-04   | 5.07E-04 | 6.25      | 6.20      | ↑                  |
| Daidzein               | 1.29E-04           | 2.22E-04 | 1.62E-04 | 2.78E-04 | 5.86E-04   | 3.32E-04 | 4.55      | 3.62      | ↑                  |
| Acetyl Alanine         | 3.03E-04           | 5.21E-04 | 3.15E-04 | 5.44E-04 | 1.22E-03   | 8.80E-04 | 4.03      | 3.88      | ↑                  |
| 5-Methoxytryptamine    | 1.28E-04           | 2.64E-04 | 5.59E-05 | 3.47E-05 | 5.03E-04   | 3.23E-04 | 3.94      | 9.01      | ↑                  |
| Lignoceric Acid        | 3.68E-04           | 2.36E-04 | 5.17E-04 | 2.70E-04 | 8.32E-04   | 2.30E-04 | 2.26      | 1.61      | ↑                  |
| Squalene               | 2.65E-03           | 1.01E-03 | 2.59E-03 | 9.62E-04 | 2.79E-03   | 8.90E-04 | 1.06      | 1.08      | ↑                  |
| Trisaccharide          | 8.32E-05           | 4.80E-05 | 8.49E-05 | 3.25E-05 | 6.23E-05   | 3.46E-05 | 0.75      | 0.73      | ↓                  |
| Phenylacetic acid      | 2.04E-03           | 1.25E-03 | 1.70E-03 | 9.05E-04 | 1.12E-03   | 5.93E-04 | 0.55      | 0.66      | ↓                  |
| 3-Arylcabonyl-Alanine  | 5.69E-04           | 4.48E-04 | 5.95E-04 | 2.90E-04 | 3.11E-04   | 2.29E-04 | 0.55      | 0.52      | ↓                  |
| Erythritol             | 1.82E-04           | 8.12E-05 | 1.30E-04 | 5.16E-05 | 9.62E-05   | 5.23E-05 | 0.53      | 0.74      | ↓                  |
| Glutamate              | 9.28E-04           | 2.56E-04 | 8.55E-04 | 4.51E-04 | 4.78E-04   | 1.45E-04 | 0.52      | 0.56      | ↓                  |
| Cytosine               | 6.97E-04           | 3.56E-04 | 6.59E-04 | 2.90E-04 | 3.36E-04   | 1.30E-04 | 0.48      | 0.51      | ↓                  |
| Stigmasterol           | 1.89E-03           | 1.09E-03 | 1.62E-03 | 3.86E-04 | 6.66E-04   | 3.71E-04 | 0.35      | 0.41      | ↓                  |

C, Control; S, Stroke; FC, Fold Change; SD, standard deviation; ↑up regulation; ↓down regulation

**Table S4.** KEGG pathway analysis

| KEGG_ID | Pathway Name                                | KEGG Compound          | Enriched Metabolites | p-value |
|---------|---------------------------------------------|------------------------|----------------------|---------|
| ko00100 | Steroid biosynthesis                        | C00751, C01724, C05442 | 3                    | 0.0017  |
| ko00650 | Butanoate metabolism                        | C00025, C01384         | 2                    | 0.0156  |
| ko00471 | D-Glutamine and D-glutamate metabolism      | C00025                 | 1                    | 0.0572  |
| ko00380 | Tryptophan metabolism                       | C00328, C05659         | 2                    | 0.0578  |
| ko00250 | Alanine, aspartate and glutamate metabolism | C00025                 | 1                    | 0.1110  |
| ko00010 | Glycolysis / Gluconeogenesis                | C06186                 | 1                    | 0.1420  |
| ko00910 | Nitrogen metabolism                         | C00025                 | 1                    | 0.1200  |
| ko00480 | Glutathione metabolism                      | C00025                 | 1                    | 0.1710  |
| ko00340 | Histidine metabolism                        | C00025                 | 1                    | 0.1950  |
| ko00760 | Nicotinate and nicotinamide metabolism      | C01384                 | 1                    | 0.1950  |
| ko00360 | Phenylalanine metabolism                    | C07086                 | 1                    | 0.2030  |
| ko00500 | Starch and sucrose metabolism               | C16688                 | 1                    | 0.2190  |
| ko01040 | Biosynthesis of unsaturated fatty acids     | C08320                 | 1                    | 0.2340  |
| ko00240 | Pyrimidine metabolism                       | C00380                 | 1                    | 0.2530  |
| ko00970 | Aminoacyl-tRNA biosynthesis                 | C00025                 | 1                    | 0.3110  |
| ko00350 | Tyrosine metabolism                         | C00483                 | 1                    | 0.3140  |
| ko00330 | Arginine and proline metabolism             | C00025                 | 1                    | 0.3340  |
| ko00520 | Amino sugar and nucleotide sugar metabolism | C00645                 | 1                    | 0.3510  |
| ko00860 | Porphyryn and chlorophyll metabolism        | C00025                 | 1                    | 0.4680  |
